# Supplementary material
Source: Springer Nature journal article supplement (https://www.springermedizin.de/resource/supplementary/12874_2010_522_MOESM1_ESM.pdf/9432566)
Supplement: MOESM1 [file 9432566]

Clinician / delegate approaches patient in person **Makes judgement of patient's capacity to consent**

**Interested:**  
Gives information sheets and consent forms

**Not interested:**  
**Declined**

(Option to phone local number & have questions answered)

Consent forms can be signed on the day if patient/carer have had sufficient time to consider the implications & have questions answered. **Consented**

Patient Consent form and Carer Consent form can be returned in the post  
**Consented**

At next appointment – clinician / delegate asks if patient and carer want to consent. Answer any questions they have.

**Want to sign: Consented**

**Do not want to sign: Declined**
